# Supplementary material for: Patient-Derived Orthotopic Xenograft (PDOX) Mouse Models of Primary and Recurrent Meningioma
Source: PubMed Central journal article supplement (PMC7352400; doi:10.3390/cancers12061478), 2020-06-05
Supplement: cancers-12-01478-s001.pdf [file cancers-12-01478-s001.pdf]

Supplementary Materials

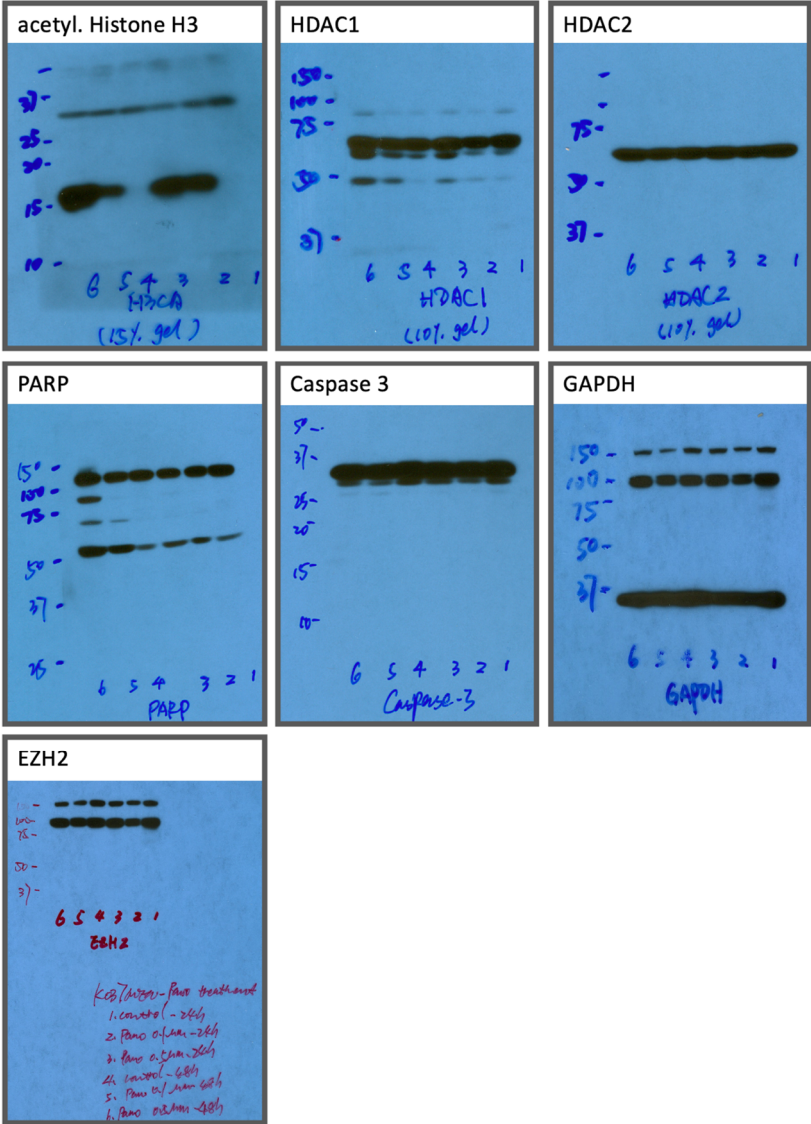

Figure S1. Western blot, unaltered scans.
